# Supplementary material
Source: PubMed Central journal article supplement (PMC6570582)

**Table S1. Details of endovascular interventions (82 patients treated for mesenteric malperfusion syndrome)**

| Level of aortic fenestration/stenting | Aortic Fenestration | Aortic Stenting | Branch Vessel Thrombolysis | Branch Vessel Suction Embolectomy | Branch Vessel Stenting |
|---------------------------------------|---------------------|-----------------|----------------------------|-----------------------------------|------------------------|
| Descending Thoracic                   | 0                   | 1               | -                          | -                                 | -                      |
| Supraceliac                           | 14                  | 20              | -                          | -                                 | -                      |
| Celiac                                | 16                  | 0               | 0                          | 0                                 | 3                      |
| Supramesenteric                       | 30                  | 44              | -                          | -                                 | -                      |
| Mesenteric                            | 10                  | 0               | 3                          | 1                                 | 42                     |
| Suprarenal                            | 3                   | 3               | -                          | -                                 | -                      |
| Transrenal                            | 12                  | 5               | -                          | -                                 | -                      |
| Infrarenal                            | 28                  | 46              | -                          | -                                 | -                      |

**Table S2. Comorbidities and clinical condition on admission of patients with mesenteric malperfusion syndrome or no malperfusion syndrome (only patients who underwent open aortic repair)**

|                                               | All patients<br>(n=466) | MesMPS<br>(n=47) | Non-MPS<br>(n=419) | p value |
|-----------------------------------------------|-------------------------|------------------|--------------------|---------|
| Time Period                                   |                         |                  |                    | < 0.001 |
| First Decade (1996-2007)                      | 181 (39)                | 31 (66)          | 150 (36)           |         |
| Second Decade (2008-2017)                     | 285 (61)                | 16 (34)          | 269 (64)           |         |
| <u>Demographics and chronic comorbidities</u> |                         |                  |                    |         |
| Age on admission (years)                      | 59 (49, 68)             | 57 (51, 67)      | 59 (49, 68)        | 0.68    |
| Gender (female)                               | 140 (30)                | 11 (23)          | 129 (31)           | 0.29    |
| NYHA class                                    |                         |                  |                    | 0.28    |
| I or II                                       | 344 (74)                | 40 (85)          | 304 (73)           |         |
| III or IV                                     | 98 (21)                 | 7 (15)           | 91 (22)            |         |
| CAD                                           | 81 (17)                 | 10 (21)          | 71 (17)            | 0.46    |
| History of MI                                 | 24 (4.9)                | 4 (8.5)          | 20 (4.6)           | 0.29    |
| Previous cardiac surgery                      | 45 (9.7)                | 8 (17)           | 37 (8.8)           | 0.11    |
| Hypertension                                  | 326 (70)                | 40 (85)          | 289 (68)           | 0.017   |
| COPD                                          | 41 (8.8)                | 4 (8.5)          | 37 (8.8)           | 1.0     |
| Smoking status                                |                         |                  |                    | 0.81    |
| Never smoker                                  | 217 (47)                | 21 (45)          | 196 (47)           |         |

|                                           |                |                |                |        |
|-------------------------------------------|----------------|----------------|----------------|--------|
| Former smoker                             | 120 (26)       | 14 (30)        | 106 (25)       |        |
| Current smoker                            | 127 (27)       | 12 (26)        | 115 (27)       |        |
| Diabetes                                  | 27 (5.8)       | 2 (4.3)        | 25 (6.0)       | 1.0    |
| Chronic kidney disease                    | 16 (3.4)       | 5 (11)         | 11 (2.6)       | 0.016  |
| History of CVA                            | 14 (3.0)       | 3 (6.4)        | 11 (2.6)       | 0.16   |
| PVOD                                      | 55 (12)        | 7 (15)         | 48 (11)        | 0.49   |
| Connective tissue disorder                | 27 (5.8)       | 1 (2.1)        | 26 (6.2)       | 0.50   |
| <u>Clinical condition on admission</u>    |                |                |                |        |
| Cardiogenic shock                         | 35 (7.5)       | 0 (0)          | 35 (8.4)       | 0.038  |
| Acute MI                                  | 0 (0)          | 0 (0)          | 0 (0)          |        |
| Tamponade                                 | 40 (8.6)       | 1 (2.1)        | 39 (9.3)       | 0.16   |
| Aortic Insufficiency                      |                |                |                | 0.99   |
| None                                      | 123 (26)       | 14 (30)        | 109 (26)       |        |
| Trace/trivial                             | 50 (11)        | 6 (13)         | 44 (11)        |        |
| Mild                                      | 87 (19)        | 8 (17)         | 79 (19)        |        |
| Moderate                                  | 77 (17)        | 8 (17)         | 69 (16)        |        |
| Severe                                    | 100 (21)       | 11 (23)        | 89 (21)        |        |
| Acute stroke                              | 3 (0.6)        | 1 (2.1)        | 2 (0.5)        | 0.27   |
| Acute paralysis                           | 3 (0.6)        | 3 (6.4)        | 0 (0)          | 0.001  |
| Creatinine on admission (mg/dL)           | 1.0 (0.8, 1.3) | 1.4 (1.0, 2.6) | 1.0 (0.8, 1.2) | <.0001 |
| AKI                                       | 53 (11)        | 35 (74)        | 18 (4.3)       | <.0001 |
| Requiring new dialysis<br>pre-operatively | 4 (0.9)        | 4 (8.5)        | 0 (0)          | <.0001 |

|                     |          |          |       |         |
|---------------------|----------|----------|-------|---------|
| Renal MPS           | 30 (6.4) | 30 (64)  | 0 (0) | < 0.001 |
| Lower extremity MPS | 35 (7.5) | 35 (74)  | 0 (0) | < 0.001 |
| Initial management  |          |          |       |         |
| IR                  | 47 (10)  | 47 (100) | 0 (0) | < 0.001 |

---

Data presented as median (interquartile range) for continuous variables and number (percentage) for categorical variables. AKI = acute kidney injury; CAD = coronary artery disease; COPD = chronic obstructive pulmonary disease; CVA = cerebrovascular accident; IR = endovascular procedure by interventional radiology; MI = myocardial infarction; MPS = malperfusion syndrome; Non-MPS = no malperfusion syndrome; NYHA = New York Heart Association; PVOD = peripheral vascular occlusive disease.

**Table S3. Intra-operative variables of patients with mesenteric malperfusion syndrome or no malperfusion syndrome (only patients who underwent open aortic repair)**

|                                           | All patients<br>(n=466) | MesMPS<br>(n=47) | Non-MPS<br>(n=419) | p value |
|-------------------------------------------|-------------------------|------------------|--------------------|---------|
| Previous cardiac surgery<br>(reoperation) | 45 (9.7)                | 8 (17)           | 37 (8.8)           | 0.11    |
| Aortic root procedure                     |                         |                  |                    | 0.60    |
| None                                      | 36 (7.7)                | 5 (11)           | 31 (7.4)           |         |
| Root replacement                          | 156 (33)                | 14 (30)          | 142 (34)           |         |
| Root repair                               | 265 (57)                | 28 (60)          | 237 (57)           |         |
| AVR only                                  | 9 (1.9)                 | 0 (0)            | 9 (2.2)            |         |
| Aortic arch procedure                     |                         |                  |                    | 0.66    |
| None                                      | 29 (6.2)                | 1 (2.1)          | 28 (6.7)           |         |
| Transverse arch (0 branch vessels)        | 275 (59)                | 27 (57)          | 248 (59)           |         |
| Zone 1 arch (1-2 branch vessel(s))        | 36 (7.7)                | 3 (6.4)          | 33 (7.9)           |         |
| Zone 2 arch (2-3 branch vessels)          | 90 (19)                 | 12 (26)          | 78 (19)            |         |
| Zone 3 arch (3-4 branch vessels)          | 36 (7.7)                | 4 (8.5)          | 32 (7.6)           |         |
| Frozen elephant trunk                     | 28 (6.0)                | 2 (4.3)          | 26 (6.2)           | 1.0     |

Concomitant Procedures

|                                      |                  |                |                |        |
|--------------------------------------|------------------|----------------|----------------|--------|
| CABG                                 | 24 (5.2)         | 0 (0)          | 24 (5.7)       | 0.15   |
| MV procedure                         | 2 (0.4)          | 0 (0)          | 2 (0.5)        | 1.0    |
| TV procedure                         | 4 (0.9)          | 0 (0)          | 4 (0.9)        | 1.0    |
| CPB time (minutes)                   | 219.5 (179, 272) | 222 (185, 261) | 219 (177, 275) | 0.77   |
| Cross clamp time (minutes)           | 154 (115, 199)   | 156 (127, 191) | 154 (114, 201) | 0.91   |
| HCA performed                        | 439 (94)         | 46 (98)        | 393 (94)       | 0.50   |
| HCA time (minutes)                   | 35 (28, 45)      | 38 (30, 46)    | 35 (28, 45)    | 0.2    |
| Type of cerebral perfusion           |                  |                |                | 0.65   |
| ACP only                             | 142 (30)         | 12 (26)        | 130 (31)       |        |
| RCP only                             | 174 (37)         | 18 (38)        | 156 (37)       |        |
| Both ACP and RCP                     | 119 (26)         | 15 (32)        | 104 (25)       |        |
| Neither ACP nor RCP                  | 30 (6.4)         | 2 (4.3)        | 28 (6.7)       |        |
| Intraoperative PRBC transfusion, yes | 350 (75)         | 43 (91)        | 307 (73)       | 0.006  |
| Intraoperative PRBC units            | 4 (1, 8)         | 7 (5, 10)      | 4 (1, 7)       | <.0001 |
| 0                                    | 94 (21)          | 3 (6.5)        | 91 (23)        | <.0001 |
| 1-2                                  | 69 (16)          | 3 (6.5)        | 66 (17)        |        |
| 3-4                                  | 81 (18)          | 4 (8.7)        | 77 (19)        |        |

≥ 5

200 (45)

36 (78)

164 (41)

---

Data presented as median (interquartile range) for continuous variables and number (percentage)

for categorical variables. Missing data points were excluded. ACP = antegrade cerebral perfusion; AVR = aortic valve replacement; CABG = coronary artery bypass graft; CPB = cardiopulmonary bypass; HCA = hypothermic circulatory arrest; MesMPS = mesenteric malperfusion syndrome; MPS = malperfusion syndrome; MV = mitral valve procedure; Non-MPS = no malperfusion syndrome; PRBC = packed red blood cell; RCP = retrograde cerebral perfusion; TV = tricuspid valve procedure.

**Table S4. Detailed cause of death in patients with organ failure following endovascular fenestration/stenting by interventional radiology (IR), but before open repair or discharge**

| Case | Age | Year of Treatment | Additional Sites of Malperfusion                 | Cause of Death                                                                                 |
|------|-----|-------------------|--------------------------------------------------|------------------------------------------------------------------------------------------------|
|      |     |                   | <u>First Decade</u>                              |                                                                                                |
| 1    | 76  | 2000              | Renal, Lower Extremity                           | Renal failure, lower extremity necrosis                                                        |
| 2    | 48  | 2002              | Renal, Lower Extremity                           | Extensive necrotic bowel                                                                       |
| 3    | 51  | 2003              | Cerebral, Renal, Lower Extremity                 | Neurologic, renal failure, respiratory failure, shock                                          |
| 4    | 38  | 2003              | Celiac/hepatic, Renal, Lower Extremity           | Necrotic lower extremity, shock, acidosis, renal failure, respiratory failure, hepatic failure |
| 5    | 56  | 2005              | Spinal, Renal, Lower Extremity                   | Shock; withdrawal of care                                                                      |
| 6    | 74  | 2006              | Isolated Mesenteric                              | Inoperable necrotic bowel                                                                      |
| 7    | 69  | 2006              | Cerebral                                         | Stroke, arrhythmia                                                                             |
| 8    | 36  | 2006              | Lower Extremity                                  | Extensive bowel necrosis, severe acidosis and hyperkalemia, not compatible with life           |
| 9    | 80  | 2007              | Celiac/hepatic, Renal                            | Renal failure, respiratory failure, pneumonia, withdrawal of care                              |
| 10   | 41  | 2007              | Cerebral, Celiac/hepatic, Renal, Lower Extremity | Large cerebral infarction, cerebral edema, brain herniation, withdrawal of care                |
|      |     |                   | <u>Second decade</u>                             |                                                                                                |
| 11   | 68  | 2008              | Cerebral, Spinal, Renal, Lower Extremity         | Large stroke, withdrawal of care                                                               |
| 12   | 67  | 2008              | Cerebral, Renal                                  | Extensive stroke, withdrawal of care                                                           |
| 13   | 35  | 2009              | Celiac/hepatic                                   | Renal failure, liver failure, shock                                                            |
| 14   | 55  | 2011              | Renal, Lower Extremity                           | Respiratory failure, renal failure, sepsis, necrotic bowel, shock                              |
| 15   | 60  | 2011              | Cerebral, Renal                                  | Severe large stroke, necrotic bowel, renal failure, brain herniation, withdrawal of care       |
| 16   | 53  | 2012              | Cerebral, Renal                                  | Liver injury, sepsis, shock, diffuse brain infarction                                          |
| 17   | 90  | 2015              | Isolated Mesenteric                              | Shock, acidosis, renal failure                                                                 |
| 18   | 73  | 2016              | Renal, Lower Extremity                           | Respiratory failure, renal failure, liver failure, necrotic bowel                              |
| 19   | 43  | 2016              | Cerebral, Renal                                  | Necrotic bowel, lower extremity ischemia, arrhythmia                                           |
| 20   | 74  | 2016              | Renal, Lower Extremity                           | Bilateral lower extremity necrosis, refused amputation                                         |



Figure S1

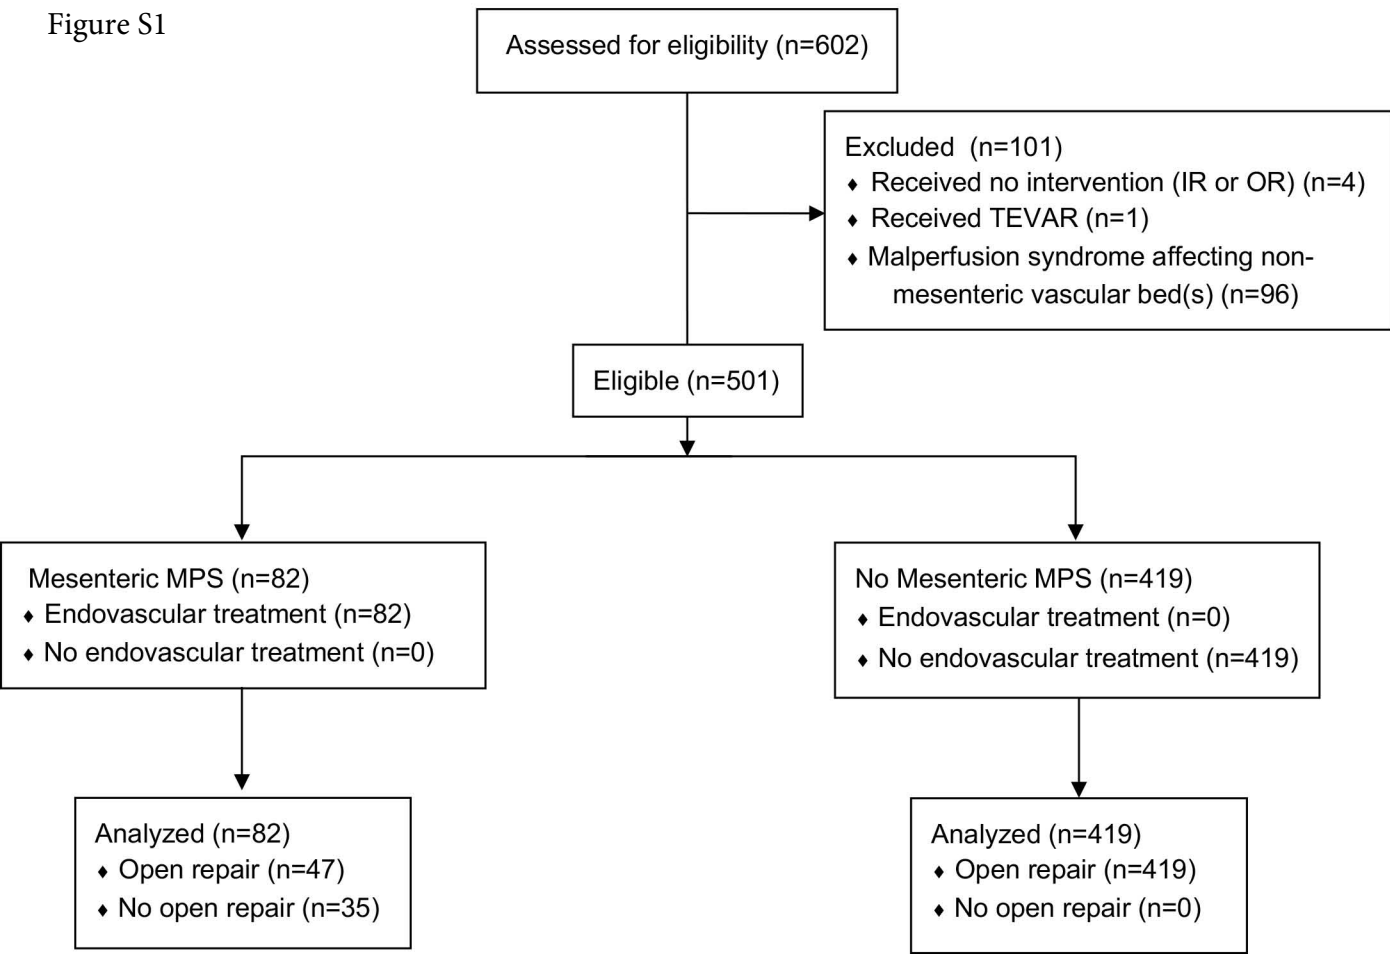

Supplement: NIHMS1516677-supplement-1.pdf [file NIHMS1516677-supplement-1.pdf]
